# Supplementary material
Source: PubMed Central journal article supplement (PMC5995523)
Supplement: supp_RA118.002538_136163_1_supp_109995_p6kvvq.pdf [file supp_RA118.002538_136163_1_supp_109995_p6kvvq.pdf]

## SUPPLEMENTARY INFORMATION

Linker engineering in anti-TAG-72 antibody fragments optimizes biophysical properties, serum half-life, and high-specificity tumor imaging

**Nicholas E. Long<sup>1,2</sup>, Brandon J. Sullivan<sup>1</sup>, Haiming Ding<sup>3</sup>, Stephanie Doll<sup>3</sup>, Michael A. Ryan<sup>1,2</sup>, Charles L. Hitchcock<sup>4</sup>, Edward W. Martin, Jr.<sup>5</sup>, Krishan Kumar<sup>3</sup>, Michael F. Tweedle<sup>3</sup>, and Thomas J. Magliery<sup>1,\*</sup>**

<sup>1</sup>Department of Chemistry and Biochemistry, The Ohio State University, Columbus, Ohio 43210; <sup>2</sup>Ohio State Biochemistry Program, The Ohio State University, Columbus, Ohio 43210; <sup>3</sup>Laboratory for Translational Research in Imaging Pharmaceuticals, Wright Center of Innovation in Biomedical Imaging, Department of Radiology, College of Medicine, The Ohio State University, Columbus, Ohio 43210; <sup>4</sup>Department of Pathology, College of Medicine, The Ohio State University, Columbus, Ohio 43210, <sup>5</sup>Department of Surgery, College of Medicine, The Ohio State University, Columbus, Ohio 43210

Running Title: *Engineering scF<sub>v</sub> Linkers for Cancer Imaging*

\*To whom correspondence should be addressed: Prof. Thomas J. Magliery, Department of Chemistry and Biochemistry, 100 W. 18<sup>th</sup> Ave., Columbus, Ohio 43210, Telephone: (614) 247-8425; E-mail: magliery.1@osu.edu

Items included in this document:

- 1) Supplementary Table 1: Antibody Protein and DNA Sequences
- 2) Supplementary Figure 1: Binding affinity of 3E8 library members
- 3) Supplementary Figure 2: Comparison of Ni-NTA IMAC purification with protein L purification
- 4) Supplementary Figure 3: The reproducibility of the oligomeric states of 3E8.G4S
- 5) Supplementary Figure 4: Cloning schematic of tagless linker library
- 6) Supplementary Figure 5: Analytical ultracentrifugation
- 7) Supplementary Figure 6: Separation and characterization of 3E8.G4S oligomeric states
- 8) Supplementary Figure 7: Oligomer concentration and 6x-His tag independence.
- 9) Supplementary Figure 8: Protein standards for size exclusion chromatography columns

## SUPPLEMENTARY TABLE 1

Table of Antibody Template Protein, Template DNA, and Primer DNA Sequences

| Name                                                        | Sequence                                                                                                                                                                                                                                                                                                                                                                                                                                                                                                                                                                                                                                                                                                                                                                                                                                                                                                                                                                                                                                  |
|-------------------------------------------------------------|-------------------------------------------------------------------------------------------------------------------------------------------------------------------------------------------------------------------------------------------------------------------------------------------------------------------------------------------------------------------------------------------------------------------------------------------------------------------------------------------------------------------------------------------------------------------------------------------------------------------------------------------------------------------------------------------------------------------------------------------------------------------------------------------------------------------------------------------------------------------------------------------------------------------------------------------------------------------------------------------------------------------------------------------|
| 3E8 V <sub>L</sub> -205C-V <sub>H</sub> (AA)                | MKYLLPTAAAGLLLLAAQPAMAA HHHHHHGSSGGGENLYFQ GSSG<br>DIVMTQSPDSLAVSLGERATINCKSSQSVLYSSNNKNYLAWYQQKPGQPPKLLIY<br>WASTRESGVPDRFSGSGSGTDFTLTISLQAEDVAVYYCQQYYSYPLTFGGGTKVEIK<br><b>LSADDAKKDAAKKDDAKKDDAKKDL</b><br>QVQLVQSGAEVKKPGASVKVCKASGYTFTDHAHWVRQAPGQRLEWMGYFSPGN<br>DDFKYSQKFKGRVTITADKSASTAYMELSSLRSEDVAVYYCARSWIMQYWGQGTLVTVSS                                                                                                                                                                                                                                                                                                                                                                                                                                                                                                                                                                                                                                                                                                      |
| 3E8 V <sub>L</sub> -205C-V <sub>H</sub> (DNA)               | CATATGAAATATCTGTTACCTACTGCTGCTGCGGGCCTGCTATTATTAGCGGCACAACCAG<br>CAATGGCGGCGCATCATCATCATCATCATGGGTCCTCGGGCGGTGGCGAAAATCTGTATT<br>TTCAGGGTAGCAGCGGCGATATTGTGATGACCCAGAGCCCGATAGTTTGGCCGTAGCC<br>TGGGCGAACGTGCGACGATTAATTGCAAGAGCAGCCAGAGCGTGCTTTACAGCAGCAACA<br>ATAAGAATTACCTGGCGTGGTATCAGCAAAAACCCGGCCAGCCGCCGAAACTTTTGATTTAT<br>TGGGCGAGCACCCGTGAAAGCGGCGTGCCGGATCGTTTCTCGGGCTCAGGCAGCGGGACC<br>GATTTTACGCTGACCATCAGCAGCCTTCAGGCGGAGGATGTCGCGGTGTACTACTGCCAGC<br>AGTATTACAGCTATCCGTTGACCTTTGGGGGAGGCACCAAAGTGGAGATCAAACTGAGCGG<br><b>CGGATGATGCTAAGAAAGATGCGGGCAAGAAGGACGATGCGAAAAAAGACGACGCAAAA</b><br><b>AAGGATCTGCAGGTGCAGCTGGTGCAGTCGGGTGCGGAAGTGAAGAAACCTGGGGCGTCG</b><br><b>GTGAAAGTGAGCTGCAAAGCGAGCGGCTATACCTTACCGATCATGCGATTATTGGGTGCG</b><br><b>TCAAGCGCCAGGCCAGCGTCTGGAATGGATGGGCTATTTTTCCCAGGCAACGATGATTTCA</b><br><b>AGTATTCCAGAAGTCCAAGGGCGCTGACCATTACCGCCGATAAAAGCGCAAGCACCGCG</b><br><b>TATATGGAGCTGTCCAGCTGCGTAGCGAAGATACAGCGGTTACTATTGCGCACGGAGCTG</b><br><b>GATTATGCAATACTGGGGCCAGGGCACCTGGTGACCGTGAGCAGCTAAGGATCC</b> |
| 3E8 V <sub>H</sub> -G <sub>4</sub> S-V <sub>L</sub> (AA)    | MKYLLPTAAAGLLLLAAQPAMAA HHHHHHGSSGGGENLYFQ GSSG<br>QVQLVQSGAEVKKPGASVKVCKASGYTFTDHAHWVRQAPGQRLEWMGYFSPGN<br>DDFKYSQKFKGRVTITADKSSSTAYMELSSLRSEDVAVYYCARSWIMQYWGQGTLVTVSS<br><b>GGGGS</b><br>DIVMTQSPDSLAVSLGERATINCKSSQSVLYSSNNKNYLAWYQQKPGQPPKLLIY<br>WASTRESGVPDRFSGSGSGTDFTLTISLQAEDVAVYYCQQYYSYPLTFGGGTKVEIK                                                                                                                                                                                                                                                                                                                                                                                                                                                                                                                                                                                                                                                                                                                          |
| 3E8 V <sub>H</sub> -G <sub>4</sub> S-V <sub>L</sub> (DNA)   | CATATGAAATACTTGCTGCCAACGGCAGCTGCCGACTACTCCTATTAGCCGCTCAACCTG<br>CTATGGCCGCACATCACCATCACCATCACGGAAGCAGTGGAGGCGGTGAGAACCTATACT<br>TCCAGGGAAGTCCGGCCAAGTACAAGTACAGTACAGTCCGGGGCGGAAGTCAAGAAACCG<br>GGTGCAAGCGTGAAGGTGAGTTGTAAGCATCTGTTTATACATTACAGACCATGCGATA<br>CATTGGGTGAGACAAGCACCGGGCAACGTCTGGAATGGATGGGGTACTTTAGCCCTGGG<br>AATGACGATTTCAAGTACTCTCAAAAATTTCAAGCCGGTTACAATCACCGCCGATAAATC<br>ATCGTCAACAGCCTATATGGAGCTTTCGTCCTGAGATCTGAGGATACGGCTGTTTACTAT<br>TGCGCGAGATCTTGATAATGCAGTATTGGGGACAAGGTACCCTCGTAACTGTGTCATCTG<br><b>GCGGAGGTGGCTCCGACATTGTGATGACACAGAGTCTGACTCATTAGCGGTTTCTTGGG</b><br><b>GGAACGGGCAACTATTAAGTCCAGTCAATCGGTCCTGACTCGTCAAATAACAAGA</b><br><b>ATTATTTAGCTTGGTACCAGCAAAGCCTGGGCAGCCGCTAAACTTTTGATCTACTGGGCG</b><br><b>AGCACTAGAGAGTCCGGAGTACCAGACCGCTTAGTGGGTGAGGTTCTGGAACGGATTTTA</b><br><b>CCCTCACTATTTGAGCTTACAGGCGGAAGATGTAGCTGTCTATTACTGCCAGCAGTATTATA</b><br><b>GCTATCCACTTACG TTCGGCGGTGGCACCAAGGTTGAAATAAAATAAGGATCC</b>                                                                                 |
| V <sub>L</sub> -V <sub>H</sub> Forward Amplification Primer | 5' – ATTATTATTCATATGAAATATCTGTTACCTACTGC – 3'                                                                                                                                                                                                                                                                                                                                                                                                                                                                                                                                                                                                                                                                                                                                                                                                                                                                                                                                                                                             |
| V <sub>L</sub> -V <sub>H</sub> Reverse Amplification Primer | 5' – AATAATGGATCCTTAGCTGCTCACGGTCAC – 3'                                                                                                                                                                                                                                                                                                                                                                                                                                                                                                                                                                                                                                                                                                                                                                                                                                                                                                                                                                                                  |
| V <sub>L</sub> -V <sub>H</sub> Forward Mutagenic Primer     | 5' – GCACCAAAGTGGAGATCAAA – Mut. Region – CAGGTGCAGCTGGTACAG – 3'                                                                                                                                                                                                                                                                                                                                                                                                                                                                                                                                                                                                                                                                                                                                                                                                                                                                                                                                                                         |

|                                                             |                                                                       |
|-------------------------------------------------------------|-----------------------------------------------------------------------|
| V <sub>L</sub> -V <sub>H</sub> Reverse Mutagenic Primer     | 5' – CTGTACCAGCTGCACCTG - Mut. Region - TTTGATCTCCACTTTGG TGC – 3'    |
| V <sub>H</sub> -V <sub>L</sub> Forward Amplification Primer | 5' – ATTATTATTCATATGAAATACTTGCTGCCAAC – 3'                            |
| V <sub>H</sub> -V <sub>L</sub> Reverse Amplification Primer | 5' – AATTATGGATCCTTATTTATTTCAACCTTG – 3'                              |
| V <sub>H</sub> -V <sub>L</sub> Forward Mutagenic Primer     | 5'–CTC GTA ACT GTA TCA TCT – Mut. Region - GAC ATT GTA ATG ACA CAG–3' |
| V <sub>H</sub> -V <sub>L</sub> Reverse Mutagenic Primer     | 5'–CTG TGT CAT TAC AAT GTC – Mut. Region - AGA TGA TAC AGT TAC GAG–3' |

**Supplementary Table 1:** The table above shows the protein and DNA sequences of the V<sub>L</sub>-V<sub>H</sub> and V<sub>H</sub>-V<sub>L</sub> templates (from Yoon et al. 2006) used to create the original 17-member tagged library. Variable light and heavy domains are *italicized* and the linker is shown in **bold**. In addition, amplification primer sequence as well as general mutagenic sequences for mutagenic primers are shown.

FIGURE S1

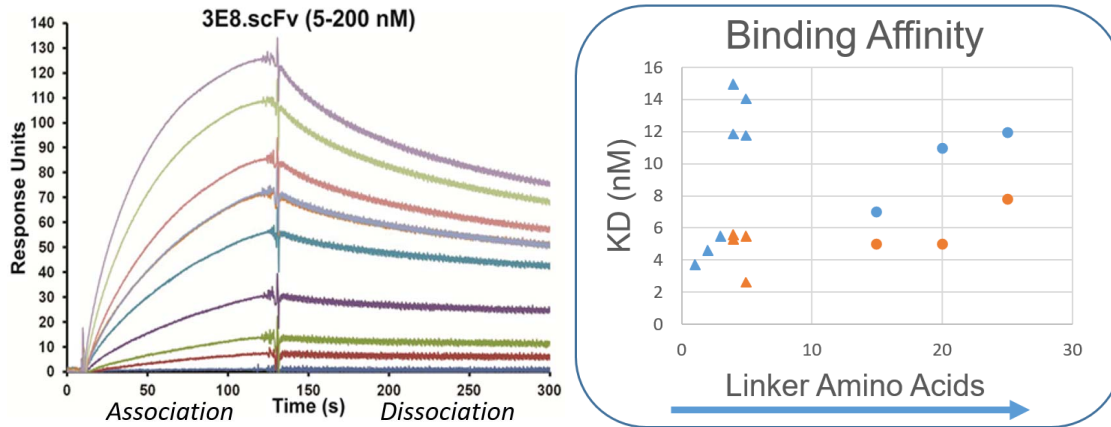

**Supplementary Figure 1:** Binding affinity of 3E8 library members was determined by SPR. (A) Representative association and dissociation curves of 3E8 V<sub>L</sub>-205C-V<sub>H</sub> construct produced by BIACORE software. Concentrations of antibodies were 0 nM, 5 nM, 10 nM, 25 nM, 50 nM, 75 nM (in duplicate), 100 nM, 150 nM, and 200 nM. (B) Correlative scatter plot showing calculated K<sub>D</sub> in relation to linker length in both V<sub>L</sub>-V<sub>H</sub> orientation (blue) and V<sub>H</sub>-V<sub>L</sub> orientation (orange). Constructs with majority monomeric species are shown as a circle, constructs with majority dimeric species are shown as a triangle.

FIGURE S2

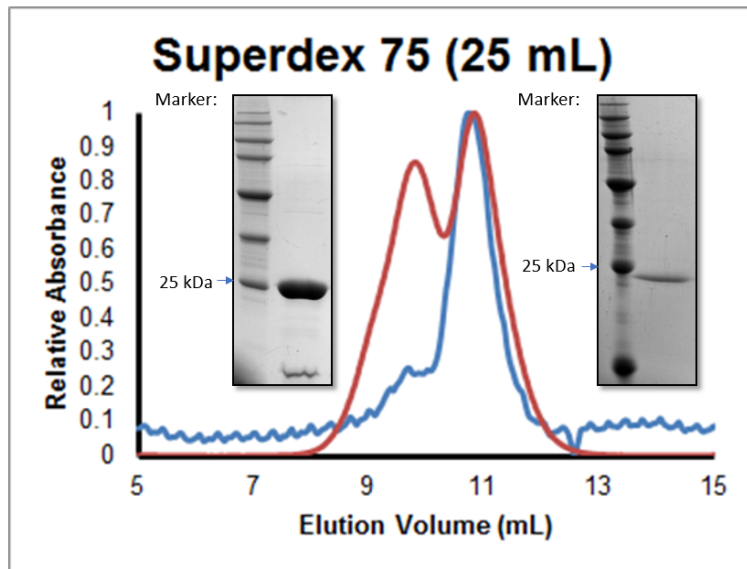

**Supplementary Figure 2:** Comparison of Ni-NTA IMAC purification with Protein L purification. SDS-PAGE gel shows purified protein yields of 3E8.G<sub>4</sub>S are increased with Protein L (left) than that of IMAC purification (right). The gel filtration chromatograph shows substantial differences in oligomeric states between methods of purification. Protein L purification (red) produces two peaks corresponding to dimer and higher order oligomer trimer and tetramers. IMAC purification (blue) produces a nearly homogeneous dimer peak.

FIGURE S3

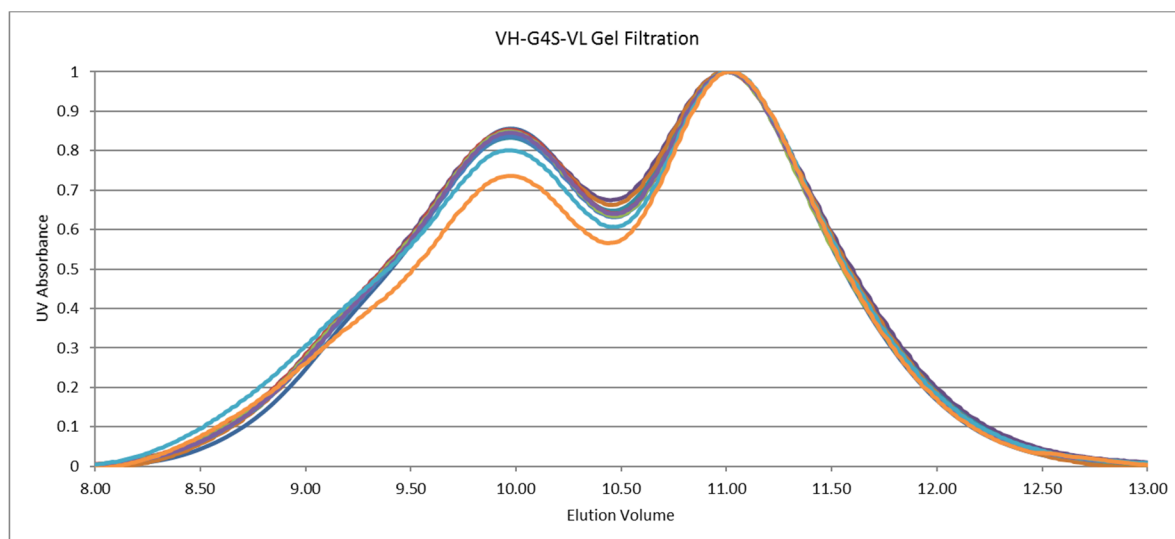

**Supplementary Figure 3:** The reproducibility of the oligomeric states of 3E8.G<sub>4</sub>S (V<sub>H</sub>-G<sub>4</sub>S-V<sub>L</sub>) was tested to determine if the distribution was dependent on the specific linker or varied with conditions. Our results showed a small fluctuation of trimer and tetramer relative to the dimer species but overall the ratio fell within an average of ten percent.

FIGURE S4

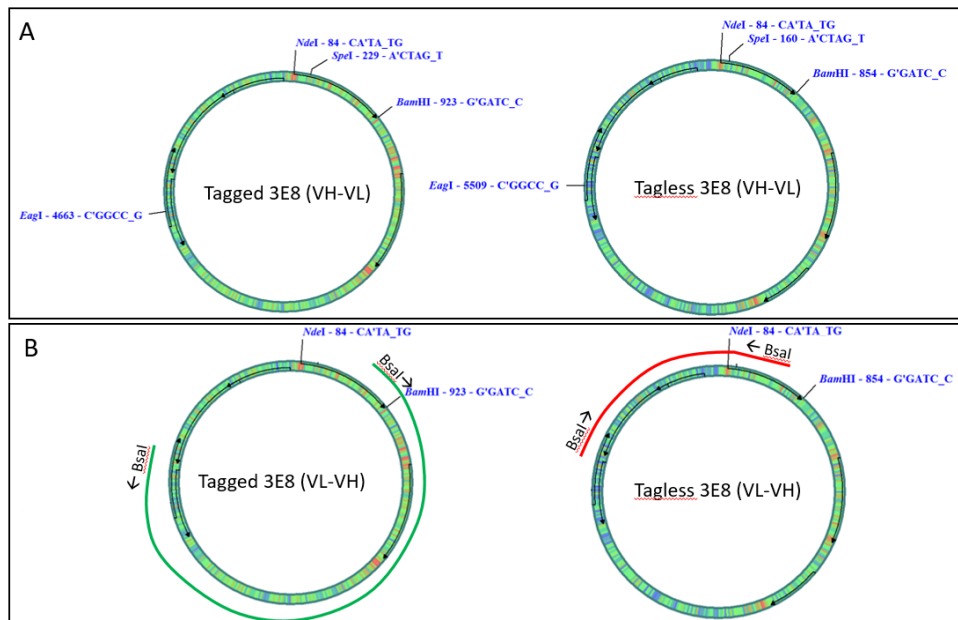

**Supplementary Figure 4:** Cloning schematic of tagless linker library. (A) Tagless library members with V<sub>L</sub>-V<sub>H</sub> orientation were cloned using *SpeI* and *EagI* restriction sites. *SpeI* is located within the 3E8 gene between the TEV site and variable linker region. The small digested fragment of tagless construct 3E8.G<sub>4</sub>S was ligated to the large digested fragments from each V<sub>H</sub>-V<sub>L</sub> library member. (B) Mutagenic primers with flanking *BsaI* sites were used to PCR out a small fragment of the tagless 3E8 construct V<sub>L</sub>-205C-V<sub>H</sub> and a large fragment from all tagged V<sub>H</sub>-V<sub>L</sub> library members. *BsaI* sites were removed after digestion and complimentary overhangs between the two PCR fragments were ligated together.

FIGURE S5

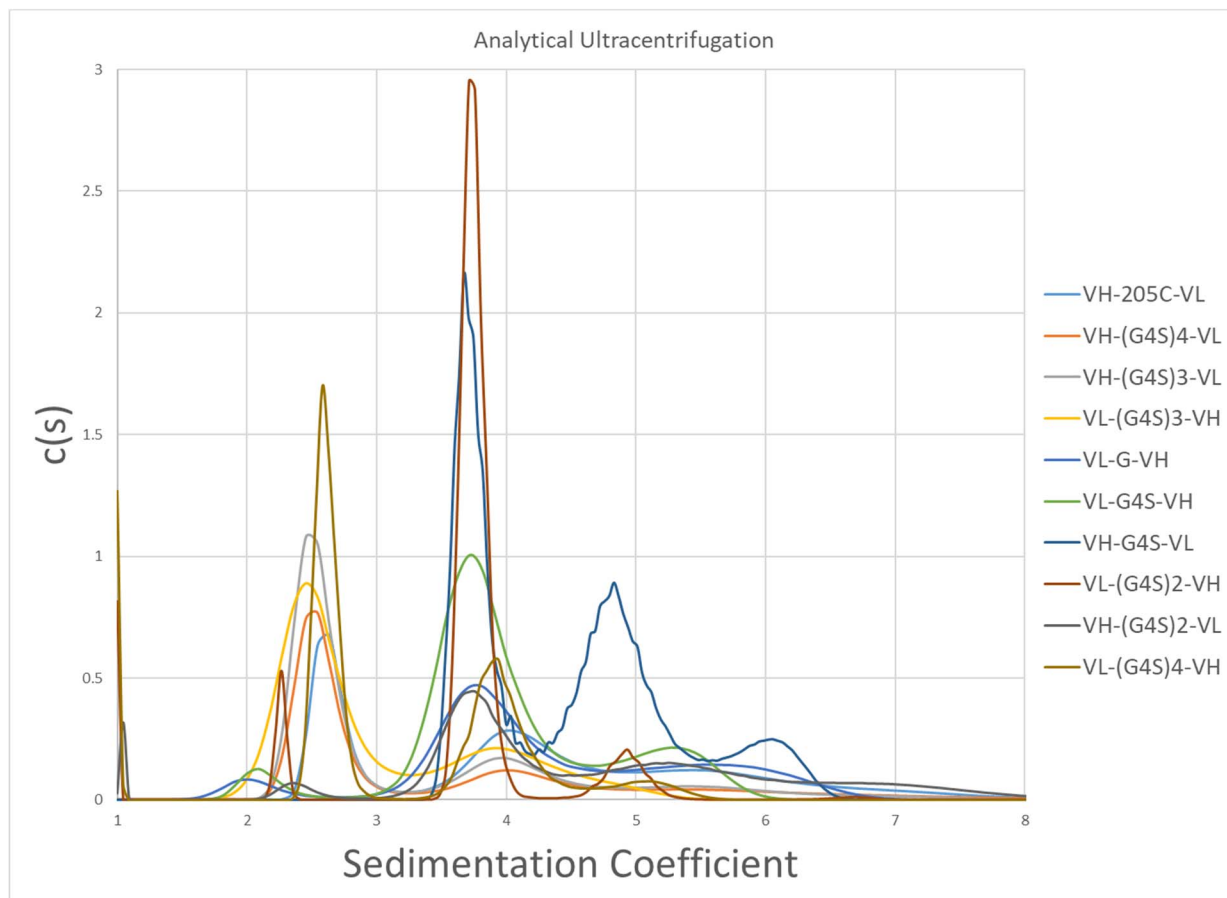

**Supplementary Figure 5:** Analytical ultracentrifugation (AUC) of select tagless antibodies was performed to corroborate gel filtration data. Sedfit analysis determined the peaks (left to right) to be monomer (2.5), dimer (3.75), trimer (4.8), and tetramer (6). Calculated ratios of oligomeric state were in general agreement with those determined by gel filtration.



**FIGURE S6****Separation and characterization of oligomeric species:**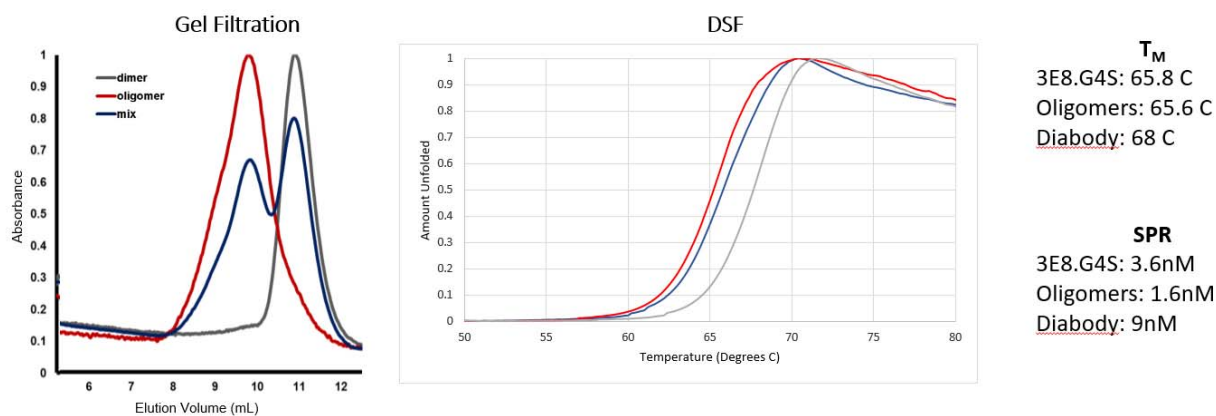

**Supplementary Figure 6:** Separation and characterization of 3E8.G<sub>4</sub>S oligomeric states. (Left) Gel filtration chromatograph showing unfractionated 3E8.G<sub>4</sub>S (blue). Dimer and oligomer peaks were collected and re-injected onto the column as a single dimer peak (grey) and oligomer peak (red). (Middle) DSF of 3E8.G<sub>4</sub>S and separated dimer/oligomer samples. (Right) DSF and SPR melting temperatures and measured binding affinities of unfractionated 3E8.G<sub>4</sub>S, diabody fraction, and oligomer fraction.

FIGURE S7

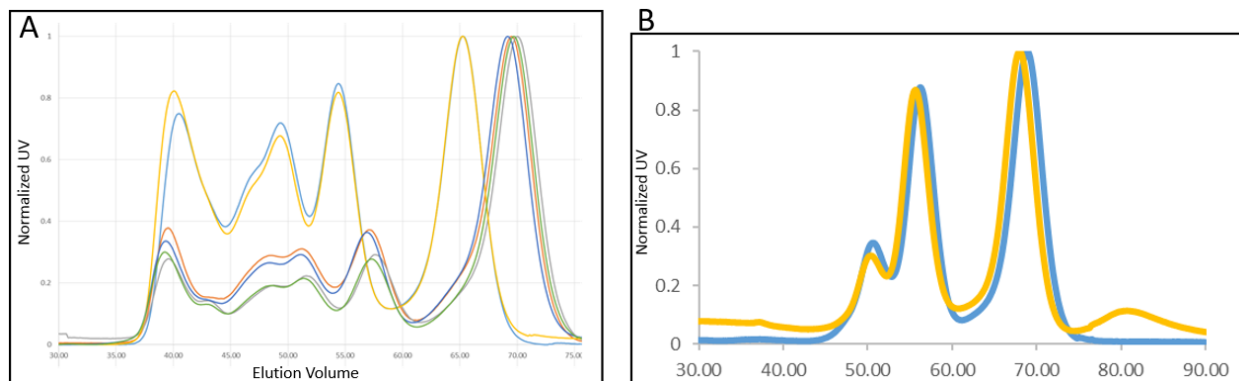

**Supplementary Figure 7:** Oligomer concentration and 6x-His tag independence. (A) Normalized gel filtration of V<sub>H</sub>-205C-V<sub>L</sub>, V<sub>H</sub>-(G<sub>4</sub>S)<sub>4</sub>-V<sub>L</sub>, and V<sub>H</sub>-(G<sub>4</sub>S)<sub>3</sub>-V<sub>L</sub> antibody constructs at 0.2 mg/mL and 0.8 mg/mL concentrations. (B) 6x-His tag removal of V<sub>L</sub>-(G<sub>4</sub>S)<sub>4</sub>-V<sub>L</sub> antibody construct

FIGURE S8

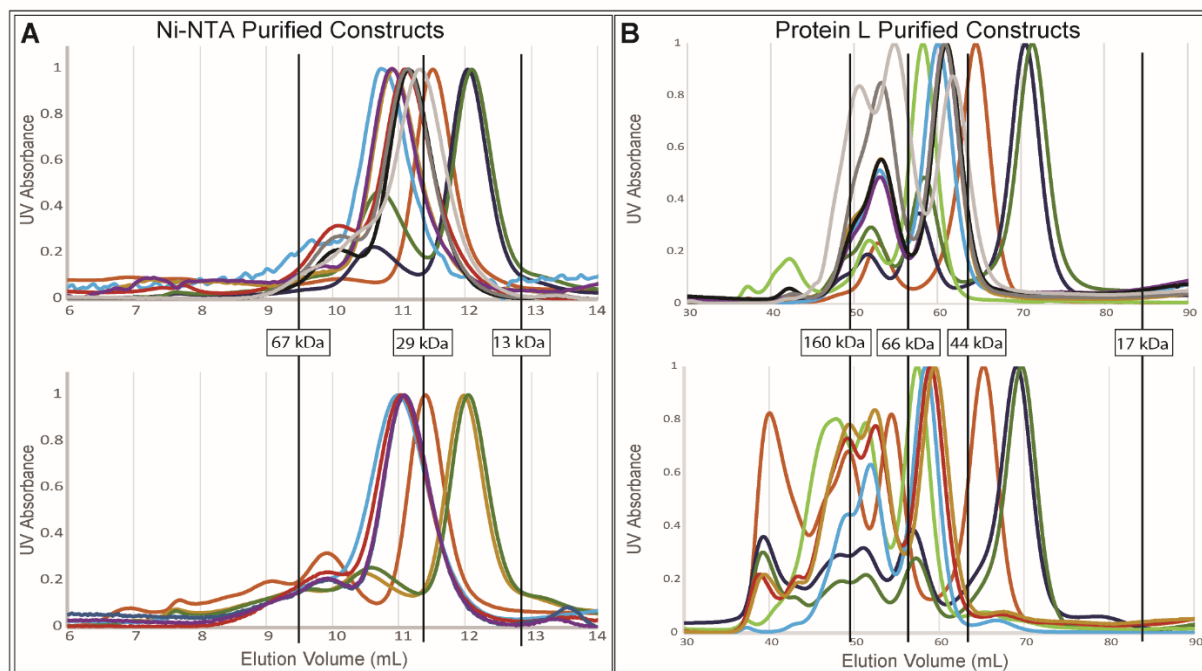

**Supplementary Figure 8:** Protein standards for size exclusion chromatography columns. (A) Analytical Superdex 75 column with protein standards BSA (67 kDa), carbonic anhydrase (29 kDa), and cytochrome c (13 kDa). Gly-Ser linker antibody constructs elute more slowly than expected, probably due to non-spherical shape or interactions with the resin. Protein size was further validated with (B) prep grade Superdex 75 column with protein standards IgG (160 kDa), albumin (66 kDa), ovalbumin (44 kDa), and myoglobin (17 kDa).
